# Supplementary material for: Gene Co-expression Network Analysis of the Comparative Transcriptome Identifies Hub Genes Associated With Resistance to Aspergillus flavus L. in Cultivated Peanut (Arachis hypogaea L.)
Source: Front Plant Sci. 2022 Jun 15;13:899177. doi: 10.3389/fpls.2022.899177 (PMC9264616; doi:10.3389/fpls.2022.899177)
Supplement: Supplementary Table S1 — Primers used for RT-qPCR analysis. [file Data_Sheet_1.xlsx]

## Sheet: Table 1
	Table 1. Hub genes involved in resistance to A. flavus in salmon4 and maroon
	Module	Categories	Hub genes	Connectivity	Functional annotation
	Salmon4	Bet v1 PR10	arahy. 8M77KD	32.3357	disease-resistance response protein
		Bet v1 PR10	arahy. FJZ5Z0	31.8809	disease-resistance response protein
		Bet v1 PR10	arahy. BKK3KP	30.8103	disease-resistance response protein
		Bet v1 PR10	arahy. TQJ4QI	28.9308	disease-resistance response protein
		Bet v1 PR10	arahy. EK7MW8	28.6067	disease-resistance response protein
		Bet v1 PR10	arahy. 3X96H9	27.5861	disease-resistance response protein
		ACO1	arahy. 78SDCB	28.0057	1-aminocyclopropane-1-carboxylate oxidase
		ACO1	arahy. GI6PPK	27.5077	1-aminocyclopropane-1-carboxylate oxidase
		MAPK kinase	arahy. L410JY	29.8707	Protein kinase superfamily protein
		MAPK kinase	arahy. BC5GM2	28.4238	Protein kinase superfamily protein
		STK protein	arahy. D2YYPY	29.2324	receptor serine/threonine kinase, putative
		PRRs	arahy. RPV0D7	27.9118	receptor kinase 1
		Cytochrome P450	arahy. DB7AVX	28.2278	cytochrome P450, family 711, subfamily A, polypeptide 1
		SNARE protein SYP121	arahy. NX6A0A	28.3759	syntaxin of plants 121
		Pectinesterase/pectinesterase inhibitor	arahy. 323PP5	30.1303	probable pectinesterase/pectinesterase inhibitor 17-like [Glycine max]
	Maroon	PITPs	arahy. HTAW4M	386.612	Sec14p-like phosphatidylinositol transfer family protein
		PITPs	arahy. E2N38F	382.85	Sec14p-like phosphatidylinositol transfer family protein
		PPR	arahy. EJT9JS	397.142	Pentatricopeptide repeat (PPR) superfamily protein

## Sheet: Table S1
	Supplementary Table S1. Primers used for qRT-PCR analysis
	Gene names	Forward primer sequence (5'-3')	Reverse primer sequence (5'-3')	Product size (bp)
	Arahy.78SDCB.1	TGGTAGCGAGAGGAAGGCTA	GAAGATGGCGCAAGAAGAAG	212
	Arahy.M23BVA.1	TGGCGTGTATGGGAGTTGTA	AAACCTGTCCTTTGCACCAC	185
	Arahy.BKK3KP.1	GTCGAGGATGGAGAAACCAA	CACTCAGCTTCCCAATGGAT	178
	Arahy.4T2HBI.1	AAATCACCTCCACCCTACCC	GCCTCCACTTTGTGCAAGAT	190
	Arahy.CVE390.1	GTCGAGGATGGAGAAACCAA	CACTCAGTTTCCCGATGGAT	178
	Arahy.BC5GM2.1	CTTTGGGCTTGCTAGAACTACAT	CTGGTCATTATTTCACCGAGGAT	159
	Arahy.4D4R47.1	GAGTGGGAAGACAAGCGAAG	TCAGCTTGAGAGTGGGCTTT	210
	Arahy.TL9E5R.1	GATACCTCGGCAGCAACATT	GCTTCGGTGCATTCTCTAGG	221
	Arahy.IKG909.1	TCTTGGGAGGGTTTCATTTG	TTCCTCCTCAACATCGCTCT	176
	Arahy.K4VY4I.1	AGCCACAATCATGGACACAA	CTCGCCACGTGGTTCTCTAT	162
	Arahy.2WY12S.1	CGGGAACAAATTCAACGTCT	ACCACCATTAGCAGCAAACC	189
	Arahy.MSPK9F.1	TGTTTACCCCACCGTTCATT	GTACCGAAACCACTCCCTGA	158
	AhADH3	GACGCTTGGCGAGATCAACA	AACCGGACAACCACCACATG	140

## Sheet: Table S2
	Supplementary Table S2. Detail information of sequencing reads from different sample groups
	Sample ID	Total Raw Reads (bp)	Total Clean Reads (bp)	Total Clean Bases (Gb)	Clean reads q20	Clean reads q30	Clean reads ratio	Total mapping genome ratio	Uniquely mapping genome ratio
	R-T0-1	9618688800	9530170116	9.90797	9225936107 (96.81%)	8683594931 (91.12%)	0.990797	61678532 (97.00%)	53063762 (83.45%)
	R-T0-2	9664905300	9577538357	9.9096	9284050041 (96.94%)	8750948846 (91.37%)	0.99096	61959826 (97.25%)	53137561 (83.41%)
	R-T0-3	10028958900	9935735002	9.90705	9644048328 (97.06%)	9121157932 (91.80%)	0.990705	64341967 (97.20%)	55620942 (84.03%)
	R-T1-1	10105954500	10033083810	9.92789	9717960455 (96.86%)	9138479177 (91.08%)	0.992789	65231267 (97.30%)	55644696 (83.00%)
	R-T1-2	11849317500	11748986003	9.91533	11390427163 (96.95%)	10713546909 (91.19%)	0.991533	73651859 (93.59%)	62284929 (79.15%)
	R-T1-3	9266360400	9199310233	9.92764	8903522434 (96.78%)	8354573190 (90.82%)	0.992764	60043808 (97.65%)	51411090 (83.61%)
	R-T2-1	9255208500	9182646143	9.9216	8900145764 (96.92%)	8366003619 (91.11%)	0.99216	59937844 (97.52%)	51373389 (83.59%)
	R-T2-2	10619618100	10540979385	9.92595	10203403823 (96.80%)	9581437948 (90.90%)	0.992595	68642271 (97.44%)	59043137 (83.81%)
	R-T2-3	10000784700	9923916156	9.92314	9624622743 (96.98%)	9073547247 (91.43%)	0.992314	64540057 (97.19%)	55177634 (83.09%)
	R-T3-1	9843139800	9755719545	9.91119	9444061684 (96.81%)	8875331851 (90.98%)	0.991119	63094274 (96.61%)	53288553 (81.59%)
	R-T3-2	9635807100	9561869260	9.92327	9273812506 (96.99%)	8737865557 (91.38%)	0.992327	54545308 (85.31%)	46208456 (72.27%)
	R-T3-3	9648171900	9579421195	9.92874	9297958574 (97.06%)	8768423049 (91.53%)	0.992874	62329567 (97.38%)	53306578 (83.28%)
	R-T5-1	9749714700	9663655255	9.91173	9349646646 (96.75%)	8776417249 (90.82%)	0.991173	62843605 (97.22%)	53829105 (83.27%)
	R-T5-2	9670435800	9585263575	9.91193	9290537418 (96.93%)	8746745471 (91.25%)	0.991193	61011635 (95.18%)	51902410 (80.97%)
	R-T5-3	9949533600	9864595796	9.91463	9554587050 (96.86%)	8984296535 (91.08%)	0.991463	58914653 (89.29%)	50249322 (76.16%)
	R-T7-1	9601609500	9530902766	9.92636	9209673243 (96.63%)	8621934856 (90.46%)	0.992636	49517410 (77.96%)	41962593 (66.06%)
	R-T7-2	9447632400	9365546863	9.91312	9083695760 (96.99%)	8554332626 (91.34%)	0.991312	53765032 (85.83%)	45886596 (73.25%)
	R-T7-3	10045395900	9973612318	9.92854	9674997751 (97.01%)	9115299651 (91.39%)	0.992854	47400039 (71.26%)	40401196 (60.74%)
	S-T0-1	9329773800	9247966602	9.91232	8952905352 (96.81%)	8410553702 (90.94%)	0.991232	60060288 (97.29%)	51293693 (83.09%)
	S-T0-2	9141031500	9059821127	9.91116	8772203235 (96.83%)	8247499696 (91.03%)	0.991116	58746819 (97.28%)	49874485 (82.59%)
	S-T0-3	10600794600	10510051727	9.9144	10157605894 (96.65%)	9523733470 (90.62%)	0.99144	68106241 (97.09%)	58481859 (83.37%)
	S-T1-1	10258659600	10170454671	9.91402	9835365414 (96.71%)	9223880331 (90.69%)	0.991402	65825965 (97.07%)	55785098 (82.26%)
	S-T1-2	10063139700	9980858132	9.91823	9651020722 (96.70%)	9051189328 (90.69%)	0.991823	64783884 (97.27%)	54799955 (82.28%)
	S-T1-3	9548994900	9474835486	9.92234	9174769890 (96.83%)	8619557148 (90.97%)	0.992234	60976992 (96.46%)	51468001 (81.42%)
	S-T2-1	30290471700	30047760510	9.91987	29064472865 (96.73%)	27291016236 (90.83%)	0.991987	174515702 (87.12%)	146847775 (73.30%)
	S-T2-2	8976357900	8897375512	9.91201	8595210480 (96.60%)	8062446977 (90.62%)	0.991201	57372836 (96.58%)	48574454 (81.77%)
	S-T2-3	11641805400	11539788836	9.91237	11160432667 (96.71%)	10477504281 (90.79%)	0.991237	71738784 (92.95%)	60933345 (78.95%)
	S-T3-1	10214115900	10121534262	9.90936	9803035340 (96.85%)	9215803627 (91.05%)	0.990936	38418103 (56.82%)	32302969 (47.77%)
	S-T3-2	9321479400	9244133082	9.91702	8960074159 (96.93%)	8432181898 (91.22%)	0.991702	46907599 (76.02%)	39525053 (64.05%)
	S-T3-3	9882339000	9789010782	9.90556	9460935258 (96.65%)	8877735204 (90.69%)	0.990556	60768195 (92.90%)	51192558 (78.26%)
	S-T5-1	11210688000	11121965645	9.92086	10764285868 (96.78%)	10100325132 (90.81%)	0.992086	14634697 (19.73%)	12078476 (16.28%)
	S-T5-2	9553235400	9477934815	9.92118	9189320920 (96.95%)	8640807211 (91.17%)	0.992118	4846726 (7.66%)	3979213 (6.29%)
	S-T5-3	10762428300	10659143150	9.90403	10336391472 (96.97%)	9732577846 (91.31%)	0.990403	29925482 (41.97%)	25066841 (35.15%)
	S-T7-1	9773989800	9710713281	9.93526	9415788273 (96.96%)	8860475720 (91.24%)	0.993526	14383694 (22.27%)	11929418 (18.47%)
	S-T7-2	11975870700	11875419995	9.91612	11507638614 (96.90%)	10821085466 (91.12%)	0.991612	10322148 (13.02%)	8469472 (10.68%)
	S-T7-3	10044458700	9959357747	9.91528	9658748022 (96.98%)	9095460592 (91.33%)	0.991528	10972256 (16.51%)	9124979 (13.73%)

## Sheet: Table S3
	Supplementary Table S3. Gene number of each module
	Module	Gene number
	antiquewhite4	14491
	deeppink1	4973
	magenta	1778
	honeydew1	1564
	lightblue3	1031
	maroon	968
	coral3	781
	plum4	664
	mediumpurple1	465
	darkgrey	403
	blueviolet	387
	darkslateblue	351
	slateblue	311
	salmon4	171
	brown2	132
	mediumpurple4	107
	grey	2

## Sheet: Table S4
	Supplementary Table S4. Connectivity of genes in Salmon4
	Gene name	Connectivity	TF family	Gene function
	arahy. JUAS4E	33.5037	-	cation/H+ exchanger 17
	arahy. 8M77KD	32.3357	-	disease-resistance response protein
	arahy. KNUI9Y	32.0275	-	ATPase family AAA domain-containing protein 1-like
	arahy. FJZ5Z0	31.8809	-	disease-resistance response protein
	arahy. 40EGC8	30.9231	-	DWNN domain, a CCHC-type zinc finger
	arahy. BKK3KP	30.8103	-	disease-resistance response protein
	arahy. 323PP5	30.1303	-	probable pectinesterase/pectinesterase inhibitor 17-like
	arahy. L410JY	29.8707	-	Protein kinase superfamily protein
	arahy. D2YYPY	29.2324	-	receptor serine/threonine kinase, putative
	arahy. GX4ZEE	29.063	-	senescence-associated carboxylesterase 101-like [Glycine max]
	arahy. 5E7A70	28.9674	-	Winged-helix DNA-binding transcription factor family protein, putative isoform 1 n=2 Tax=Theobroma cacao RepID=UPI00042B60CA
	arahy. TQJ4QI	28.9308	-	disease-resistance response protein
	arahy. EK7MW8	28.6067	-	disease-resistance response protein
	arahy. BC5GM2	28.4238	-	Protein kinase superfamily protein
	arahy. NX6A0A	28.3759	-	syntaxin of plants 121
	arahy. DB7AVX	28.2278	-	cytochrome P450, family 711, subfamily A, polypeptide 1
	arahy. 78SDCB	28.0057	-	1-aminocyclopropane-1-carboxylate oxidase
	arahy. RPV0D7	27.9118	-	receptor kinase 1
	arahy. 3X96H9	27.5861	-	disease-resistance response protein
	arahy. GI6PPK	27.5077	-	1-aminocyclopropane-1-carboxylate oxidase
	arahy. H9TBH9	27.4269	-	disease-resistance response protein
	arahy. UT7DLW	26.4916	-	disease-resistance response protein
	arahy. M23BVA	26.2322	-	receptor serine/threonine kinase, putative
	arahy. EP17SZ	25.8686	-	Nup85 nucleoporin protein
	arahy. AE54YU	25.7472	-	LRR and NB-ARC domain disease resistance protein
	arahy. A338HQ	25.2493	-	u6 snRNA-associated-like-Smprotein
	arahy. PTQD44	25.0873	-	Protein kinase superfamily protein
	arahy. U2Z5IS	24.7845	-	Inner membrane metabolite transport protein ygcS n=4 Tax=Rhodococcus RepID=W8HEL2_RHOOP
	arahy. JN82S8	24.6724	-	uncharacterized protein LOC100811354 isoform X3 [Glycine max]
	arahy. I4CW6I	24.6643	-	Coiled-coil domain-containing protein 25 n=17 Tax=Eutheria RepID=CCD25_HUMAN
	arahy. 46SNUH	24.5671	-	Serine/threonine protein phosphatase family protein
	arahy. 4T2HBI	24.558	-	disease-resistance response protein
	arahy. CVE390	24.5271	-	disease-resistance response protein
	arahy. DMZ0MV	24.3028	WRKY	WRKY family transcription factor family protein
	arahy. BGW4WR	23.8417	-	LRR and NB-ARC domain disease resistance protein
	arahy. P4FGTG	23.8013	-	DHHC-type zinc finger family protein
	arahy. GIK8C1	23.5944	-	unknown protein
	arahy. 305BSH	23.3742	-	Phosphoesterase
	arahy. 78DFKN	23.3296	-	Protein kinase superfamily protein
	arahy. IM7I4N	23.1353	-	receptor-like protein kinase 4
	arahy. 4SLH2G	22.9593	-	Protein kinase superfamily protein
	arahy. 0KPM2I	22.9504	-	Regulator of chromosome condensation (RCC1) family protein
	arahy. TU7XRI	22.8297	-	Adenine nucleotide alpha hydrolases-like superfamily protein
	arahy. 88RA0A	22.7924	-	plant/T10O8-60 protein
	arahy. 0SZ2NS	22.6221	-	Acyl-CoA N-acyltransferases (NAT) superfamily protein
	arahy. BEZ7GQ	22.3498	-	jasmonate-zim-domain protein 12
	arahy. Q2RJE3	22.2434	-	protein DA1-like isoform X2 [Glycine max]
	arahy. 53PT05	22.2434	-	protein DA1-like isoform X2 [Glycine max]
	arahy. I0B92H	22.1318	-	Cyclophilin-like peptidyl-prolyl cis-trans isomerase family protein
	arahy. JT5ZHZ	21.0436	-	Histidyl-tRNA synthetase 1
	arahy. IZT7WB	20.7623	-	pyruvate dehydrogenase E1 beta
	arahy. X9WDFL	20.6145	-	DNAJ-like 20
	arahy. XG4VM3	20.4955	-	hypothetical protein
	arahy. 81HEJY	19.4193	-	uncharacterized protein LOC100798536 isoform X2 [Glycine max]
	arahy. P2X2DJ	19.3636	-	H/ACA ribonucleoprotein complex subunit 3-like protein n=6 Tax=Brassicaceae RepID=NOP10_ARATH
	arahy. C986L9	19.3533	-	RING finger protein 44-like [Glycine max]
	arahy. CWZP7X	19.2906	-	unknown protein
	arahy. 1VZ6LQ	19.0579	-	endo-1,3; 1,4-beta-D-glucanase-like [Glycine max]
	arahy. 35K1T3	19.0091	-	receptor kinase 2
	arahy. U657KI	18.8381	-	double-stranded RNA-binding motif protein
	arahy. 6F524X	18.4477	-	EXPRESSED IN: 23 plant structures; EXPRESSED DURING: 14 growth stages
	arahy. RU0P4R	18.4109	-	Oxysterol-binding family protein
	arahy. MK6YQ3	18.1878	-	LRR and NB-ARC domain disease resistance protein
	arahy. DJG6PN	18.0799	-	unknown protein
	arahy. 8UN484	17.9897	-	TATA box-binding protein associated factor RNA polymerase I subunit B-like protein
	arahy. JW22BI	17.7498	-	LRR and NB-ARC domain disease resistance protein
	arahy. HG05DD	17.7226	-	phosphopantothenate-cysteine ligase-like protein
	arahy. 0T4V2C	17.6758	-	probable glucan 1,3-beta-glucosidase A-like [Glycine max]
	arahy. 65NHSX	17.385	-	tRNA-splicing endonuclease subunit Sen54-like isoform X2 [Glycine max]
	arahy. 27LE56	17.3568	-	thylakoid lumenal 19 kDa protein
	arahy. 565Y62	17.248	-	uncharacterized protein LOC100810533 isoform X2 [Glycine max]
	arahy. YIRY4V	17.0579	-	F-box protein interaction domain protein
	arahy. PP514R	17.0475	-	myosin 1
	arahy. ML4V41	17.0055	-	receptor-like protein kinase 2
	arahy. N0BIWD	16.9332	-	ENTH/VHS/GAT family protein
	arahy. X4J0KT	16.7715	-	Transmembrane protein 97, predicted
	arahy. 8X0KIE	16.6416	-	probable glucan 1,3-beta-glucosidase A-like [Glycine max]
	arahy. CGL9LR	16.5221	-	Mitochondrial ribosomal protein L27
	arahy. 29PSUQ	16.5116	-	F-box protein
	arahy. DL1CJS	16.2852	-	WD repeat-containing protein 5-like [Glycine max]
	arahy. U21TUP	15.8515	TALE	BEL1-like homeodomain protein 1-like isoform X2 [Glycine max]
	arahy. 71RKEA	15.8515	TALE	BEL1-like homeodomain protein 1-like isoform X2 [Glycine max]
	arahy. SB181I	15.7644	-	Aluminium induced protein with YGL and LRDR motifs
	arahy. I28AR0	15.734	-	Cytochrome c oxidase, subunit Vib family protein
	arahy. GDT1ET	15.6637	-	Phosphoinositide phosphatase family protein
	arahy. 2P5CMY	15.6552	-	F-box and associated interaction domains-containing protein
	arahy. BD5KCN	15.6016	-	tubulin alpha-4 chain
	arahy. 8X00QX	15.0855	GRAS	scarecrow-like protein 14-like [Glycine max]
	arahy. V3120Y	14.7706	-	Small nuclear ribonucleoprotein family protein
	arahy. CGHP2W	14.7346	-	mitochondrial import inner membrane translocase subunit TIM17-2-like [Glycine max]
	arahy. BZ8WB7	14.4278	-	RING finger protein 44-like [Glycine max]
	arahy. E0GHFU	14.0973	-	uncharacterized protein LOC100796676 [Glycine max]
	arahy. R6IGW9	14.0387	bZIP	DNA-binding protein EMBP-1, putative n=1 Tax=Ricinus communis RepID=B9RZ25_RICCO
	arahy. Y3UPDN	13.9342	-	Protein-tyrosine phosphatase-like, PTPLA
	arahy. 4PU0PP	13.9342	-	Protein-tyrosine phosphatase-like, PTPLA
	arahy. MYBE61	13.9014	-	cytochrome B-c1 complex subunit 6
	arahy. N2H9FB	13.8906	bHLH	transcription factor BIM1-like [Glycine max]
	arahy. 6EI814	13.4886	-	DNA-directed RNA polymerase I and III subunit Rpc19 n=2 Tax=Schizosaccharomyces RepID=S9R8V9_SCHOY
	arahy. 4A8T0Q	13.3608	-	DNA-directed RNA polymerases I and III subunit RPAC2-like [Glycine max]
	arahy. 67HPDN	13.0396	-	aldo/keto reductase family oxidoreductase
	arahy. U3MJA7	12.7588	-	saposin B domain-containing protein
	arahy. F6SR1U	12.6957	-	HXXXD-type acyl-transferase family protein
	arahy. PX7M3V	12.4621	-	photosystem I reaction center subunit III
	arahy. DC3VUL	12.3469	-	uncharacterized protein LOC100789230 isoform X2 [Glycine max]
	arahy. SW24RX	12.3435	-	RAN binding protein 1
	arahy. Z92MN7	12.1649	-	LORELEI-LIKE-GPI ANCHORED PROTEIN 3
	arahy. VZ7M1J	12.1231	bHLH	helix loop helix DNA-binding domain protein
	arahy. XGMW4W	11.464	-	RNA-binding (RRM/RBD/RNP motifs) family protein
	arahy. URY1CV	11.3224	-	NAD(P)H-quinone oxidoreductase subunit H
	arahy. 0H2RQJ	11.1206	-	uncharacterized protein LOC100791001 isoform X4 [Glycine max]
	arahy. 5M0T8F	10.7975	-	Protein kinase superfamily protein
	arahy. 0ZB6G2	10.572	-	Signal transduction histidine kinase n=2 Tax=Methylobacterium RepID=B1ZGT9_METPB
	arahy. NSZF19	10.1757	-	MBOAT (membrane bound O-acyl transferase) family protein
	arahy. 31QCP5	9.85827	-	wound-responsive family protein
	arahy. D1IGUM	9.83573	-	microsomal glutathione s-transferase, putative
	arahy. U8589F	9.70654	-	transcription initiation factor TFIID subunit
	arahy. GLQ651	9.10824	-	2-aminoethanethiol dioxygenase-like [Glycine max]
	arahy. 50L6WD	9.0928	-	tryptophan synthase beta chain
	arahy. H8ZZR2	9.05679	-	phosphoglucomutase, cytoplasmic-like [Glycine max]
	arahy. VA11TJ	8.88128	-	Protein phosphatase 2C family protein
	arahy. IYB3ER	8.68764	-	50S ribosomal protein L23
	arahy. WY0DQM	8.46922	-	WD repeat-containing protein 5-like [Glycine max]
	arahy. 2WLS1Y	8.32789	-	eukaryotic translation initiation factor 4B1
	arahy. C366XC	8.30895	-	auxin response factor 6
	arahy. CV0DUD	8.26767	-	Unknown protein
	arahy. 3R4C35	8.11626	-	IGR motif protein
	arahy. CT4JMD	8.11588	-	U-box domain-containing protein 18-like [Glycine max]
	arahy. KSB81E	8.08531	-	alpha-L-fucosidase 1
	arahy. ZY1N1V	8.05669	-	WD repeat-containing protein 5-like [Glycine max]
	arahy. EGZ6K4	7.88741	-	hypothetical protein
	arahy. 77ZW6W	7.88741	-	hypothetical protein
	arahy. DXNF3X	7.70608	-	uncharacterized protein LOC102664163 isoform X7 [Glycine max]
	arahy. X8VDXZ	7.32544	-	transcription initiation factor TFIID subunit 8-like [Glycine max]
	arahy. CMQU5Z	7.15328	-	RNA-binding (RRM/RBD/RNP motifs) family protein
	arahy. FFY74H	6.63137	Dof	dof zinc finger protein DOF1.4-like [Glycine max]
	arahy. A0MYZQ	6.4819	-	acytochrome-C oxidase/electron carrier protein
	arahy. M1CUAT	6.32707	-	RNA-binding KH domain-containing protein
	arahy. HX298U	6.16026	-	Mitochondrial glycoprotein family protein
	arahy. 2GY28N	6.04533	-	receptor-like kinase 1
	arahy. 6NYM2I	5.26147	-	global transcription factor group protein
	arahy. 3A01UJ	5.10762	-	mediator of RNA polymerase II transcription subunit 30, putative
	arahy. 6ERU87	4.81789	-	ACT domain repeat 1
	arahy. D07A28	4.72428	-	nucleolin-like isoform X2 [Glycine max]
	arahy. YZ31UQ	4.67918	-	phosphomevalonate kinase-like isoform X3 [Glycine max]
	arahy. UM017F	4.6786	-	unknown protein
	arahy. 8G6UBY	4.64518	-	urease accessory protein UreF
	arahy. GY80IK	4.31527	-	unknown protein
	arahy. DJE5AQ	4.00196	-	Galactose oxidase/kelch repeat superfamily protein
	arahy. X9QM54	3.83131	bHLH	transcription factor bHLH113-like [Glycine max]

## Sheet: Table S5
	Supplementary Table S5. Connectivity of genes in maroon
	Gene name	Connectivity	TF family	Gene function
	arahy. FL369X	420.775	-	nucleic acid binding; zinc ion binding; DNA binding
	arahy. RMV9AI	418.531	-	eukaryotic translation initiation factor 4G
	arahy. 6S0TFF	408.339	-	UB-like protease 1A
	arahy. BD8AAL	405.817	-	RING/FYVE/PHD zinc finger superfamily protein
	arahy. CQ4D9K	405.787	-	Ribonuclease II/R family protein
	arahy. ELEM58	404.85	-	apoptotic chromatin condensation inducer in the nucleus-like [Glycine max]
	arahy. BQYP5G	403.819	-	maestro heat-like repeat-containing protein family member 1-like isoform X1 [Glycine max]
	arahy. 1H4ABR	399.394	-	CCR4-NOT transcription complex subunit 3-like [Glycine max]
	arahy. 5TZZ24	397.889	-	protein required for actin cytoskeleton organization and cell cycle progression n=1 Tax=Punctularia strigosozonata (strain HHB-11173) RepID=UPI0004418154
	arahy. EJT9JS	397.142	-	Pentatricopeptide repeat (PPR) superfamily protein
	arahy. QS081X	394.915	-	small subunit processome component 20 homolog [Glycine max]
	arahy. 7WKR24	393.573	-	eukaryotic translation initiation factor 4G
	arahy. I67LVW	393.42	-	eukaryotic translation initiation factor 2 (eIF-2) family protein
	arahy. K8M7RX	389.651	-	AT-rich interactive domain-containing protein 3-like isoform X2 [Glycine max]
	arahy. 5CX2AU	389.651	-	AT-rich interactive domain-containing protein 3-like isoform X2 [Glycine max]
	arahy. HTAW4M	386.612	-	Sec14p-like phosphatidylinositol transfer family protein
	arahy. V7WSHY	383.575	-	DNA binding; nucleotide binding; nucleic acid binding; DNA-directed DNA polymerases; DNA-directed DNA polymerases
	arahy. E2N38F	382.85	-	Sec14p-like phosphatidylinositol transfer family protein
	arahy. 2W4JQ8	382.542	-	protein NRDE2 homolog isoform X1 [Glycine max]
	arahy. KH05JX	382.197	-	ATP-dependent DNA helicase RecG
	arahy. Z3E7QY	380.442	-	GTP-binding elongation factor Tu family protein
	arahy. SPY8PK	380.442	-	GTP-binding elongation factor Tu family protein
	arahy. 6VV6NG	376.297	-	histone-lysine N-methyltransferase ATX3-like [Glycine max]
	arahy. 14IR3Z	376.222	-	splicing factor 3B subunit 3-like isoform X2 [Glycine max]
	arahy. NQP1ZX	376.212	-	1,4-alpha-glucan-branching enzyme-like [Glycine max]
	arahy. EM3DQX	375.573	-	Protein kinase superfamily protein
	arahy. 41AL06	374.493	-	eukaryotic translation initiation factor 2 (eIF-2) family protein
	arahy. XLH660	373.74	-	unknown protein; Has 65 Blast hits to 65 proteins in 18 species: Archae - 0; Bacteria - 0; Metazoa - 0; Fungi - 0; Plants - 62; Viruses - 0; Other Eukaryotes - 3 (source: NCBI BLink).
	arahy. L0QAVJ	373.538	-	UB-like protease 1A
	arahy. 8QB15U	371	-	SKP1-like 21
	arahy. 4D4R47	369.887	-	E3 ubiquitin-protein ligase BRE1-like protein
	arahy. EM89X0	368.316	-	RNA-binding protein 39-like [Glycine max]
	arahy. 734JVH	367.673	-	myosin 1
	arahy. XU51RJ	367.449	-	uncharacterized protein LOC100793037 isoform X3 [Glycine max]
	arahy. P8VZLW	367.449	-	uncharacterized protein LOC100793037 isoform X3 [Glycine max]
	arahy. 66KNZL	366.925	-	Serine/threonine protein phosphatase family protein
	arahy. C5NHEB	366.888	-	ubiquitin-protein ligase, cullin 4
	arahy. XWQ1KT	364.444	-	transcription initiation factor TFIID subunit 4b-like isoform X1 [Glycine max]
	arahy. 8V1V91	363.913	-	ELMO domain-containing protein A-like isoform X1 [Glycine max]
	arahy. CM6PIJ	363.559	-	transcriptional corepressor LEUNIG-like isoform X3 [Glycine max]
	arahy. 12F6XV	363.138	-	DNA-(apurinic or apyrimidinic site) lyase 2-like [Glycine max]
	arahy. DS2WG6	360.989	-	Pentatricopeptide repeat (PPR-like) superfamily protein
	arahy. C8TUAR	359.563	-	Zim17-type zinc finger protein
	arahy. QV839S	359.267	-	Hydrolase/ zinc ion binding protein n=2 Tax=Andropogoneae RepID=B6SKI3_MAIZE
	arahy. 1RS262	358.894	-	expansin-like B1-like [Glycine max]
	arahy. EA1KYK	357.923	-	nuclear matrix constituent protein-related
	arahy. 99FJVY	357.197	-	Crooked neck pre mRNA splicing factor 1 n=2 Tax=Echinococcus RepID=U6HY55_ECHMU
	arahy. FJPS4C	356.944	-	protein DYAD isoform X3 [Glycine max]
	arahy. CVPH5H	356.91	-	maestro heat-like repeat-containing protein family member 1-like isoform X1 [Glycine max]
	arahy. L6NVF8	355.783	-	rootletin-like isoform X3 [Glycine max]
	arahy. ASUB10	355.672	-	ubiquitin-activating enzyme 1
	arahy. L1X5S4	355.321	-	uncharacterized protein LOC100807087 isoform X4 [Glycine max]
	arahy. QJT344	353.348	-	Ubiquitin C-terminal hydrolases superfamily protein
	arahy. M8Z2DU	350.879	-	mediator of RNA polymerase II transcription subunit 15-like isoform X1 [Glycine max]
	arahy. G0D851	349.336	-	DNA-(apurinic or apyrimidinic site) lyase 2-like [Glycine max]
	arahy. UJH74W	346.866	-	RNA-binding protein 38-like isoform X2 [Glycine max]
	arahy. E9G7WB	346.839	-	Pentatricopeptide repeat (PPR) superfamily protein
	arahy. N4BWVD	346.798	-	Unknown protein
	arahy. ED9HPN	346.659	-	early nodulin-related
	arahy. G68EH0	346.605	-	clustered mitochondria protein-like [Glycine max]
	arahy. DXQU4L	346.576	-	proton pump-interactor 1-like isoform X2 [Glycine max]
	arahy. E56BAP	346.489	-	Protein kinase superfamily protein
	arahy. T3MKLR	346.043	-	vacuolar protein sorting 11
	arahy. Z58MGP	345.889	-	Pentatricopeptide repeat (PPR) superfamily protein
	arahy. 6T17GH	345.558	-	Phox-associated domain; Phox-like; Sorting nexin, C-terminal
	arahy. T6K2Y0	344.914	-	Pentatricopeptide repeat (PPR) superfamily protein
	arahy. CPIQ3I	344.784	-	regulation of nuclear pre-mRNA domain-containing protein 1B-like isoform X4 [Glycine max]
	arahy. 5SKZ26	343.872	-	kinesin-4-like isoform X3 [Glycine max]
	arahy. 52WN7P	343.872	-	kinesin-4-like isoform X3 [Glycine max]
	arahy. 7NUW0V	343.618	-	vacuolar protein sorting-associated protein, putative
	arahy. ALQ29C	343.49	-	uncharacterized protein LOC102666492 isoform X3 [Glycine max]
	arahy. 60VEZT	343.115	-	Pentatricopeptide repeat (PPR) superfamily protein
	arahy. DBE5X7	342.866	-	E3 ubiquitin-protein ligase COP1-like [Glycine max]
	arahy. GQ31QR	341.446	-	exocyst complex component SEC6-like [Glycine max]
	arahy. LW990M	341.238	-	nuclear pore anchor
	arahy. SIBB7F	340.807	-	ATP-dependent RNA helicase, putative
	arahy. FWIG8T	340.449	HB-PHD	pathogenesis-related homeodomain protein isoform X1 [Glycine max]
	arahy. AQF1TQ	340.217	-	protein furry-like isoform X1 [Glycine max]
	arahy. MX8YYA	340.211	-	Pentatricopeptide repeat (PPR) superfamily protein
	arahy. YM2W79	339.235	-	Regulator of chromosome condensation (RCC1) family protein
	arahy. 7GH6V4	339.1	-	vacuolar H+-translocating inorganic pyrophosphatase
	arahy. G5F0QK	338.633	-	D111/G-patch domain-containing protein
	arahy. 1SB772	338.579	-	sterol 3-beta-glucosyltransferase UGT80A2-like isoform X2 [Glycine max]
	arahy. 4RS22V	338.027	-	Transcription elongation factor (TFIIS) family protein
	arahy. XN7UED	337.93	Trihelix	RNA-metabolising metallo-beta-lactamase family protein
	arahy. AVE6NE	337.881	-	sister chromatid cohesion protein PDS5 homolog B-B-like [Glycine max]
	arahy. 5UD55A	337.796	-	lysine-specific histone demethylase 1 homolog 3-like [Glycine max]
	arahy. UY60S3	335.832	-	DNA binding; nucleotide binding; nucleic acid binding; DNA-directed DNA polymerases; DNA-directed DNA polymerases
	arahy. K35IEP	335.173	-	DNA-directed RNA polymerase-like protein
	arahy. XJZ826	334.953	-	Protein kinase superfamily protein
	arahy. BY82ZN	334.448	-	Pentatricopeptide repeat (PPR) superfamily protein
	arahy. GEY0M8	333.929	-	Pentatricopeptide repeat (PPR) superfamily protein
	arahy. S6GK4T	333.521	-	Pentatricopeptide repeat (PPR) superfamily protein
	arahy. JG4KI1	333.321	-	AUTOPHAGY 8E
	arahy. 0D5YER	333.215	-	DNA-directed RNA polymerase-like protein
	arahy. 9CBY7M	332.13	-	mediator of RNA polymerase II transcription subunit 14
	arahy. Q1GILX	331.385	-	transcription initiation factor IIA large subunit-like [Glycine max]
	arahy. P5AXXG	331.105	NF-YA	CCAAT-binding transcription factor
	arahy. ALF6A9	330.071	-	myosin 1
	arahy. NU01L9	329.72	-	DNA helicase INO80-like [Glycine max]
	arahy. ZHBG52	329.57	-	1,4-alpha-glucan-branching enzyme-like [Glycine max]
	arahy. 6NC3R4	329.295	-	nucleic acid binding
	arahy. KMFZ1Q	329.204	-	Unknown protein
	arahy. HZDF69	328.984	-	Zinc-finger domain of monoamine-oxidase A repressor R1 protein
	arahy. RYFJ1I	328.695	-	Pentatricopeptide repeat (PPR) superfamily protein
	arahy. QL6Y44	328.457	-	Unknown protein
	arahy. TD7I6F	327.678	-	Cyclophilin-like peptidyl-prolyl cis-trans isomerase family protein
	arahy. WS6V9H	327.599	-	ELMO domain-containing protein A-like isoform X1 [Glycine max]
	arahy. 61WA32	327.462	-	ATP-binding ABC transporter
	arahy. 62P0D6	326.889	-	uncharacterized protein LOC100811629 isoform X2 [Glycine max]
	arahy. GC8QG2	326.009	-	RING/FYVE/PHD zinc finger superfamily protein
	arahy. M75XKZ	325.53	-	probable serine/threonine protein phosphatase 2A regulatory subunit B''delta-like isoform X3 [Glycine max]
	arahy. SP0BHI	325.453	-	proteasome inhibitor-related
	arahy. H592TP	324.835	-	zinc transporter ZTP29 isoform X3 [Glycine max]
	arahy. D7T295	324.59	-	transcriptional corepressor LEUNIG-like isoform X3 [Glycine max]
	arahy. 1EM5AW	324.191	-	phytochrome A
	arahy. V5YSST	323.181	-	Preprotein translocase SecA family protein
	arahy. 91DTPA	322.797	-	DNA-directed RNA polymerase family protein
	arahy. W8DCP7	322.621	-	nuclear matrix constituent protein-related
	arahy. 9HZQ4R	322.064	-	RRP12-like protein
	arahy. C3A8BV	322.06	-	Ran binding protein 4-like protein n=1 Tax=Ectocarpus siliculosus RepID=D7FQF7_ECTSI
	arahy. Z71440	321.874	-	uricase/urate oxidase/nodulin 35, putative
	arahy. YE7AHB	320.91	-	pumilio-family RNA-binding repeatprotein
	arahy. 1A96RS	320.554	-	nicotinamide mononucleotide adenylyltransferase, putative
	arahy. ZWYX82	319.626	-	uncharacterized protein LOC100810409 isoform X2 [Glycine max]
	arahy. 78MI69	319.296	-	endoplasmic reticulum-Golgi intermediate compartment protein 3-like [Glycine max]
	arahy. DKXM8B	319.127	-	pentatricopeptide (PPR) repeat-containing protein
	arahy. W1X4YZ	318.87	-	HIT zinc finger ; PAPA-1-like conserved region
	arahy. PHJ2IJ	318.734	-	vacuolar protein sorting protein
	arahy. G3NGVJ	318.734	-	vacuolar protein sorting protein
	arahy. 4BR56W	318.733	-	AMP deaminase-like [Glycine max]
	arahy. 014EBR	318.375	-	pathogenesis-related homeodomain protein isoform X1 [Glycine max]
	arahy. HLJ790	318.093	-	ABIL1-like protein
	arahy. YSVF0U	317.564	-	BAG family molecular chaperone regulator 6-like [Glycine max]
	arahy. 01WSAY	317.46	-	small subunit processome component 20 homolog [Glycine max]
	arahy. 8QPJ7C	316.699	-	NAD(P)-binding Rossmann-fold superfamily protein
	arahy. XFQ1DZ	316.586	-	zinc finger CCCH domain-containing protein 13-like isoform X2 [Glycine max]
	arahy. V30RJW	316.428	-	eukaryotic translation initiation factor 3B-2
	arahy. DHQL63	316.197	-	nuclear pore anchor
	arahy. R367CR	315.752	-	RNA polymerase II-associated factor 1 homolog isoform X2 [Glycine max]
	arahy. C3LD3D	315.694	-	Ras-related small GTP-binding family protein
	arahy. 8ZSB7P	315.543	-	SWI/SNF complex subunit SWI3C-like [Glycine max]
	arahy. PL5CUR	315.295	-	RNA binding rRNA processing protein n=1 Tax=Chlamydomonas reinhardtii RepID=A8IBR0_CHLRE
	arahy. YY1VWG	314.554	-	trehalose-6-phosphate synthase
	arahy. 1UFI8K	314.128	-	putative E3 ubiquitin-protein ligase UBR7 isoform X3 [Glycine max]
	arahy. 1PS119	313.999	-	Unknown protein
	arahy. YM0GIL	312.106	-	TATA-binding protein associated factor-like protein
	arahy. R0WL9G	310.159	-	chromodomain-helicase-DNA-binding protein 1-like isoform X2 [Glycine max]
	arahy. LWY0NT	309.957	-	pre-mRNA-processing protein 40C-like isoform X2 [Glycine max]
	arahy. 3Z5EIP	309.132	-	ATP-binding ABC transporter
	arahy. KKP5ML	309.073	-	DNAJ heat shock family protein
	arahy. L21B75	308.51	-	Heavy metal transport/detoxification superfamily protein
	arahy. 27HM2H	308.341	-	unknown protein
	arahy. GKEN9S	307.563	-	acyl-CoA-binding domain protein
	arahy. A72W4D	306.663	-	RNA-binding protein 42-like [Glycine max]
	arahy. D3FQJ1	306.528	-	ubiquitin-protein ligase, cullin 4
	arahy. F6SWGC	306.182	-	E3 ubiquitin-protein ligase HOS1
	arahy. 0753T9	306.182	-	E3 ubiquitin-protein ligase HOS1
	arahy. 1HT5LR	306.091	-	Unknown protein
	arahy. BNDD7K	305.79	-	Pentatricopeptide repeat (PPR) superfamily protein
	arahy. WG5ADN	305.106	-	Pentatricopeptide repeat (PPR) superfamily protein
	arahy. M4CDZT	305.025	-	Protein kinase superfamily protein
	arahy. H0AHUW	304.503	-	tyrosine aminotransferase 3
	arahy. NMJG4G	304.172	-	NADH:ubiquinone oxidoreductase intermediate-associated protein 30
	arahy. Z7Z8T5	304.078	-	uncharacterized protein LOC100527166 isoform X1 [Glycine max]
	arahy. DU6PK2	303.138	-	profilin 1
	arahy. QAN1HW	301.035	-	Adenine nucleotide alpha hydrolases-like superfamily protein
	arahy. S31791	301.014	-	RNA binding rRNA processing protein n=1 Tax=Chlamydomonas reinhardtii RepID=A8IBR0_CHLRE
	arahy. UQ25ER	300.697	-	ATP-dependent RNA helicase, putative
	arahy. 4XM3SI	300.542	-	RGPR-related
	arahy. SDZ4E8	299.974	-	RRP12-like protein
	arahy. CW9EKZ	298.406	-	preprotein translocase subunit SecA
	arahy. RTLR0M	296.872	-	RNA-binding protein 38-like isoform X2 [Glycine max]
	arahy. V3G6M8	295.95	-	coatomer subunit alpha-2-like [Glycine max]
	arahy. 9SH8TS	294.91	-	transcription initiation factor TFIID protein, putative
	arahy. 4559ZH	294.91	-	transcription initiation factor TFIID protein, putative
	arahy. DUIQ94	293.929	-	CRT (chloroquine-resistance transporter)-like transporter 2
	arahy. 586MWM	293.72	-	UPF0415 protein C7orf25 homolog isoform X2 [Glycine max]
	arahy. LM4IV6	293.605	-	uncharacterized protein LOC100810409 isoform X2 [Glycine max]
	arahy. RC242R	293.196	-	actin-related protein 2/3 complex subunit 1B
	arahy. VD4ZCS	293.058	-	nuclear cap-binding protein subunit 1-like [Glycine max]
	arahy. TAM8B0	292.523	WRKY	probable WRKY transcription factor 70-like [Glycine max]
	arahy. W310LH	292.306	-	DEAD-box ATP-dependent RNA helicase
	arahy. IU7X6X	291.524	-	Protein kinase superfamily protein
	arahy. XGVI2Q	291.505	-	Protein kinase superfamily protein
	arahy. 1MU60G	291.483	-	uncharacterized protein LOC102661544 isoform X4 [Glycine max]
	arahy. 243BFB	291.013	-	PPR containing plant-like protein
	arahy. JLPM7R	290.26	-	chromodomain-helicase-DNA-binding protein 1-like isoform X2 [Glycine max]
	arahy. J9CBMZ	289.349	-	Ran-binding protein 6 n=72 Tax=Eutheria RepID=RNBP6_HUMAN
	arahy. DPIX5V	289.32	-	transcriptional corepressor LEUNIG-like isoform X3 [Glycine max]
	arahy. HE3JP9	288.848	-	LRR and NB-ARC domain disease resistance protein
	arahy. 028SBR	288.238	-	sister chromatid cohesion protein PDS5 homolog A-like isoform X3 [Glycine max]
	arahy. 3TDE18	288.188	-	ATP-dependent RNA helicase, putative
	arahy. BWR49H	287.775	-	dentin sialophosphoprotein-like isoform X3 [Glycine max]
	arahy. PE1GUB	287.553	-	Protein kinase superfamily protein
	arahy. SM6YYV	285.357	-	unknown protein; Has 25 Blast hits to 23 proteins in 8 species: Archae - 0; Bacteria - 0; Metazoa - 0; Fungi - 0; Plants - 25; Viruses - 0; Other Eukaryotes - 0 (source: NCBI BLink).
	arahy. M87LIL	285.251	-	sister chromatid cohesion protein PDS5 homolog B-B-like [Glycine max]
	arahy. G6V4H3	284.866	-	EEIG1/EHBP1 protein amine-terminal domain protein
	arahy. 2G2M3J	284.709	-	Pentatricopeptide repeat (PPR) superfamily protein
	arahy. ET6U27	284.66	-	Xaa-pro aminopeptidase P
	arahy. R3VUJN	284.275	-	ATP-dependent DNA helicase 2 subunit Ku80
	arahy. 3YX4VX	284.097	-	Pentatricopeptide repeat (PPR) superfamily protein
	arahy. 64GWQS	282.991	-	TATA-binding protein-associated factor BTAF1-like isoform X3 [Glycine max]
	arahy. P7Z3M8	282.586	bHLH	transcription factor bHLH74-like [Glycine max]
	arahy. H7MRPA	282.531	-	Nop14 nucleolar-like protein
	arahy. L7YJN9	280.461	-	pre-mRNA splicing factor ATP-dependent RNA helicase
	arahy. KU3WND	280.373	-	chromodomain-helicase-DNA-binding protein 1-like isoform X2 [Glycine max]
	arahy. Q55GHJ	280.371	-	chromodomain-helicase-DNA-binding protein 1-like isoform X2 [Glycine max]
	arahy. 8VG426	280.268	-	Protein kinase superfamily protein
	arahy. BLN4T5	279.786	-	disease resistance protein (TIR-NBS-LRR class), putative
	arahy. XGP1KG	279.395	-	Sec23/Sec24 protein transport family protein
	arahy. 86D3P6	277.118	-	L-galactono-1,4-lactone dehydrogenase
	arahy. 1V6YFN	275.447	-	regulator of nonsense transcripts UPF3-like isoform X2 [Glycine max]
	arahy. TT8B4F	274.243	-	Y-family DNA polymerase H
	arahy. HFGS9U	273.801	-	preprotein translocase subunit SecA
	arahy. 2BTG0R	273.455	-	ubiquitin-conjugating enzyme 3
	arahy. DTTE32	272.86	-	hypothetical protein
	arahy. Z04G07	271.882	-	chromatin structure-remodeling complex protein SYD-like isoform X1 [Glycine max]
	arahy. 1M6YYJ	270.636	-	RNA polymerase II-associated factor 1 homolog isoform X2 [Glycine max]
	arahy. X5K9YD	269.649	-	RING/U-box superfamily protein
	arahy. AY4NJ9	269.17	-	ATP-binding ABC transporter
	arahy. KD6P16	268.499	-	DNA helicase INO80-like isoform 1 [Glycine max]
	arahy. 84I3GY	268.476	-	chromodomain-helicase-DNA-binding protein 1-like isoform X2 [Glycine max]
	arahy. XP1NDF	267.694	-	metallothionein 3
	arahy. UZ6AL0	266.163	-	GTP binding
	arahy. 11GZ1T	265.443	-	DEAD-box ATP-dependent RNA helicase
	arahy. THM6KE	265.351	-	Adenylate kinase family protein
	arahy. GFH1HB	265.34	-	Unknown protein
	arahy. Q71493	264.807	-	Myb/SANT-like DNA-binding domain protein
	arahy. 5T8TQ9	264.673	-	Plasma-membrane choline transporter family protein
	arahy. G3VBDM	263.816	-	proteasome-associated ECM29-like protein
	arahy. 2E0FT9	262.007	-	chromodomain-helicase-DNA-binding protein 1-like isoform X2 [Glycine max]
	arahy. 201XHT	261.647	-	Protein kinase superfamily protein
	arahy. 1KHC65	260.38	-	DEAD-box ATP-dependent RNA helicase family protein
	arahy. 3JQR8Y	260.088	-	phosphoglucan, water dikinase, chloroplastic-like isoform X2 [Glycine max]
	arahy. 48P4SG	259.942	-	myosin-10-like isoform X4 [Glycine max]
	arahy. J5HH0A	259.445	-	uncharacterized protein LOC100782051 isoform X2 [Glycine max]
	arahy. R07MUD	258.254	-	Serine/threonine protein phosphatase family protein
	arahy. 19RIMK	257.698	-	ubiquitin carboxyl-terminal hydrolase
	arahy. C9N2WV	257.391	-	Pentatricopeptide repeat (PPR) superfamily protein
	arahy. 773WC1	256.331	-	protein YLS7-like [Glycine max]
	arahy. SDBE87	256.314	-	alpha/beta fold hydrolase
	arahy. WC3YJ7	255.76	-	RNA-binding protein 42-like [Glycine max]
	arahy. GF44T2	255.214	-	hypothetical protein
	arahy. HNPA74	254.579	-	DNA binding; zinc ion binding; DNA binding
	arahy. TY68CU	254.157	-	NIPA-like protein 2-like isoform X1 [Glycine max]
	arahy. S94ZWM	253.848	-	disease resistance protein (TIR-NBS-LRR class), putative
	arahy. TALZ6N	253.836	-	Pentatricopeptide repeat (PPR-like) superfamily protein
	arahy. NAU6LA	253.134	-	DNA-directed RNA polymerase family protein
	arahy. NVTB4G	252.583	-	ubiquitin-protein ligase 4
	arahy. ZM4C11	252.364	ARR-B	two-component response regulator ARR12-like [Glycine max]
	arahy. X69RYV	251.644	-	clustered mitochondria protein-like isoform X1 [Glycine max]
	arahy. WP4SS3	251.615	-	disease resistance protein (TIR-NBS-LRR class), putative
	arahy. BDT6Z1	251.395	-	Chaperone DnaJ-domain superfamily protein
	arahy. N6SBJA	250.702	-	Endosomal targeting BRO1-like domain-containing protein
	arahy. UVB96A	249.993	-	smr (Small MutS Related) domain-containing protein
	arahy. W3DLTW	249.973	-	SNI1 isoform X1 [Glycine max]
	arahy. 62035P	247.918	-	5'-AMP-activated protein kinase beta-2 subunit protein
	arahy. Y9SFAP	247.836	-	transcription factor, putative
	arahy. C0TVG6	246.239	-	ATP-dependent RNA helicase, putative
	arahy. 7DE8S1	244.601	-	SIT4 phosphatase-associated family protein
	arahy. I0ZCH2	244.422	-	U3 small nucleolar RNA-associated protein 6 homolog [Glycine max]
	arahy. V0G4QV	243.772	-	Protein kinase superfamily protein
	arahy. AXP3WA	243.649	-	regulator of nonsense transcripts UPF3-like isoform X2 [Glycine max]
	arahy. 7H81I7	243.537	-	5'-AMP-activated protein kinase subunit beta-1-like [Glycine max]
	arahy. FD8SVX	243.328	-	zinc ion binding
	arahy. 0QS9SD	242.508	-	disease resistance protein (TIR-NBS-LRR class), putative
	arahy. L2JJZ6	240.114	-	flowering time control protein FPA-like isoform X2 [Glycine max]
	arahy. 0ASR8J	239.517	bHLH	transcription factor bHLH128-like [Glycine max]
	arahy. U399DB	239.417	-	aldehyde dehydrogenase family 2 member C4-like [Glycine max]
	arahy. I8I12Q	238.378	-	S-adenosyl-L-methionine-dependent methyltransferases superfamily protein
	arahy. ZYX06Z	236.063	-	uncharacterized protein LOC100812171 isoform X6 [Glycine max]
	arahy. 8IP107	235.612	-	DNA repair UVH3-like protein
	arahy. J24RTT	235.26	-	Bifunctional orotate phosphoribosyltransferase/orotidine 5'-phosphate decarboxylase n=1 Tax=Blattabacterium sp. (Mastotermes darwiniensis) str. MADAR RepID=G7SPT8_9FLAO
	arahy. TSZ6TX	235.057	-	WD repeat-containing protein 5-like [Glycine max]
	arahy. KE9NE3	234.951	-	pre-mRNA-processing protein 40C-like isoform X2 [Glycine max]
	arahy. 5D8RXX	234.696	-	LETM1 and EF-hand domain-containing protein 1, mitochondrial-like isoform X2 [Glycine max]
	arahy. TBH1BX	234.344	-	DNA LIGASE 6
	arahy. Q72QFH	234.344	-	DNA LIGASE 6
	arahy. 3DA894	233.668	-	probable histone-lysine N-methyltransferase ATXR3-like isoform X2 [Glycine max]
	arahy. PT0GJ5	232.543	-	PCI domain-containing protein 2 [Glycine max]
	arahy. NLIW19	231.984	-	jasmonate-zim-domain protein 6
	arahy. R5AJY0	231.96	-	calcium and calcium/calmodulin-dependent serine/threonine-protein kinase [Glycine max]
	arahy. 7I62GA	231.311	-	folylpolyglutamate synthase
	arahy. Q1DBZB	229.15	-	F-box family protein
	arahy. A42YA2	227.9	-	RING/FYVE/PHD zinc finger superfamily protein
	arahy. R6Y7HN	226.407	-	charged multivesicular body protein
	arahy. X2D3U2	225.343	-	pre-mRNA-splicing factor 18-like [Glycine max]
	arahy. 8KS6DS	224.231	-	myosin 2
	arahy. TDW4P3	224.036	-	Sec23/Sec24 protein transport family protein
	arahy. CP70Z4	223.037	-	PQ-loop repeat family protein / transmembrane family protein
	arahy. ML1F2G	222.783	-	sucrose nonfermenting 4-like protein-like isoform X1 [Glycine max]
	arahy. RCT00R	221.988	-	monogalactosyldiacylglycerol synthase 2
	arahy. QWVG1Y	220.999	-	Pentatricopeptide repeat (PPR) superfamily protein
	arahy. K52VCA	220.12	-	Pentatricopeptide repeat (PPR) superfamily protein
	arahy. W8GVKM	219.249	-	alcohol dehydrogenase 1
	arahy. C6W9N6	219.091	-	importin beta-3, putative
	arahy. LTKS6Y	218.42	-	pentatricopeptide (PPR) repeat-containing protein
	arahy. 9SE03D	216.407	-	Unknown protein
	arahy. 4T2FL2	214.256	-	Translation initiation factor 2, small GTP-binding protein
	arahy. K8THJN	213.778	-	uncharacterized protein LOC100777424 isoform X2 [Glycine max]
	arahy. 99WGGU	212.581	-	probable carboxylesterase 18-like [Glycine max]
	arahy. 356JQC	212.351	-	receptor-like serine/threonine kinase 2
	arahy. EHL0AN	210.918	-	cytoplasmic tRNA 2-thiolation protein
	arahy. HQV3E1	210.22	-	CCCH-type zinc fingerfamily protein with RNA-binding domain
	arahy. L95GGX	208.954	-	Ribonucleoside-diphosphate reductase n=12 Tax=rosids RepID=B9H5M7_POPTR
	arahy. RQMB8Y	206.481	-	filament-like plant protein 7-like isoform X1 [Glycine max]
	arahy. Y3KVHQ	205.846	-	Unknown protein
	arahy. L78ELK	203.443	-	Calcium-binding EF hand family protein
	arahy. R9UC9A	202.607	-	uncharacterized protein LOC100526959 isoform X2 [Glycine max]
	arahy. 79GVE2	202.158	-	ATP binding / kinase/ protein serine / threonine kinase n=3 Tax=Vitis vinifera RepID=C5DB47_VITVI
	arahy. WQ4R53	201.612	-	probable lysine-specific demethylase JMJ14-like isoform X4 [Glycine max]
	arahy. DD3ZZY	201.475	-	uncharacterized protein LOC100785618 isoform X4 [Glycine max]
	arahy. 66TKXZ	201.41	-	Diaminohydroxyphosphoribosylaminopyrimidine deaminase / 5-amino-6-(5-phosphoribosylamino)uracil reductase n=1 Tax=Nodularia spumigena CCY9414 RepID=A0ZBN1_NODSP
	arahy. 32QIWM	200.006	-	hypothetical protein
	arahy. YJKT09	198.364	-	long-chain-alcohol oxidase FAO1
	arahy. 4N7RMH	197.282	-	SCAR family protein
	arahy. K8ZQW4	196.333	-	DNA-(apurinic or apyrimidinic site) lyase-like isoform X2 [Glycine max]
	arahy. 489AYV	194.061	-	hypothetical protein
	arahy. U1EDB6	191.975	-	tRNA wybutosine-synthesizing-like protein
	arahy. D032ER	191.506	-	probable histone-lysine N-methyltransferase ATXR3-like isoform X2 [Glycine max]
	arahy. 87IZMR	190.23	-	mitochondrial import inner membrane translocase subunit tim16-like [Glycine max]
	arahy. 23FIWR	186.503	-	Chaperone DnaJ-domain superfamily protein
	arahy. H38YF4	182.897	-	DNA-directed RNA polymerase-like protein
	arahy. RBCV8C	182.494	-	protein EXECUTER 1, chloroplastic-like [Glycine max]
	arahy. NDW3GA	181.31	-	DNA-directed RNA polymerase III subunit RPC9-like [Glycine max]
	arahy. KI2IUQ	172.132	-	pumilio-family RNA-binding repeatprotein
	arahy. KVPH3I	161.02	-	ankyrin repeat-containing protein [Glycine max]
	arahy. IS373J	160.708	-	Pentatricopeptide repeat (PPR) superfamily protein
	arahy. 353VBZ	154.439	-	homolog of DNA mismatch repair protein MSH3
	arahy. A2LJVL	143.544	-	triacylglycerol lipase
	arahy. LE4XQH	129.678	bHLH	basic helix-loop-helix (bHLH) DNA-binding superfamily protein
	arahy. CPK3HX	121.024	-	unknown protein; Has 24 Blast hits to 24 proteins in 10 species: Archae - 0; Bacteria - 0; Metazoa - 0; Fungi - 0; Plants - 24; Viruses - 0; Other Eukaryotes - 0 (source: NCBI BLink).
	arahy. L700WL	107.39	-	4-coumarate:CoA ligase 2
